# Supplementary material for: Determination of the Thermal Parameters of Geopolymers Modified with Iron Powder
Source: MDPI journal article supplement (doi:10.3390/polym14102009), 2022-05-13
Supplement: s1 [file s1]

## Supplementary

**Table S1.** The obtained values of the thermal parameters of the geopolymer samples with sand (1:1), and the calculated statistical parameters after 28 days of conditioning in 20–22°C and a relative humidity of 52–54%

| Statistical parameters                    | Thermal properties of sample RSS1 |                                |                  |                          |
|-------------------------------------------|-----------------------------------|--------------------------------|------------------|--------------------------|
|                                           | $\lambda$ [W/(m·K)]               | $C_v$ [MJ/(m <sup>3</sup> ·K)] | $C_p$ [J/(kg·K)] | $a$ [mm <sup>2</sup> /s] |
| Quartile, $Q1$                            | 1.3726                            | 1.7418                         | 919.6            | 0.7881                   |
| Median, $M$                               | 1.6039                            | 1.8102                         | 955.8            | 0.8841                   |
| Quartile, $Q3$                            | 1.7264                            | 1.8825                         | 993.9            | 0.9153                   |
| Interquartile range, $IQR = (Q3 - Q1)$    | 0.3538                            | 0.1407                         | 74.3             | 0.1272                   |
| Higher outlier, $HO = Q3 + 1.5 \cdot IQR$ | 2.2571                            | 2.0936                         | 1105.4           | 1.1061                   |
| Lower outlier, $LO = Q1 - 1.5 \cdot IQR$  | 0.8419                            | 1.5308                         | 808.2            | 0.5973                   |
| Average value, $\bar{X}$                  | 1.5666                            | 1.8120                         | 956.7            | 0.8625                   |
| Standard deviation, $s$                   | 0.1790                            | 0.0771                         | 40.7             | 0.0642                   |
| Coefficient of variation, $CV$ [%]        | 11.43                             | 4.25                           | 4.25             | 7.44                     |
| Upper critical value, $UCV$               | 1.7545                            | 1.8929                         | 999.4            | 0.9298                   |
| Lower critical value, $LCV$               | 1.3787                            | 1.7311                         | 914.0            | 0.7951                   |

  

| Statistical parameters                    | Thermal properties of sample GS1Fe0.5 |                                |                  |                          |
|-------------------------------------------|---------------------------------------|--------------------------------|------------------|--------------------------|
|                                           | $\lambda$ [W/(m·K)]                   | $C_v$ [MJ/(m <sup>3</sup> ·K)] | $C_p$ [J/(kg·K)] | $a$ [mm <sup>2</sup> /s] |
| Quartile, $Q1$                            | 1.4383                                | 1.7589                         | 939.6            | 0.8138                   |
| Median, $M$                               | 1.4742                                | 1.8146                         | 969.3            | 0.8157                   |
| Quartile, $Q3$                            | 1.5180                                | 1.8675                         | 997.6            | 0.8218                   |
| Interquartile range, $IQR = (Q3 - Q1)$    | 0.0797                                | 0.1086                         | 58.0             | 0.0080                   |
| Higher outlier, $HO = Q3 + 1.5 \cdot IQR$ | 1.6376                                | 2.0304                         | 1084.6           | 0.8338                   |
| Lower outlier, $LO = Q1 - 1.5 \cdot IQR$  | 1.3188                                | 1.5960                         | 852.6            | 0.8018                   |
| Average value, $\bar{X}$                  | 1.4764                                | 1.8135                         | 968.8            | 0.8160                   |
| Standard deviation, $s$                   | 0.0440                                | 0.0613                         | 32.7             | 0.0066                   |
| Coefficient of variation, $CV$ [%]        | 2.98                                  | 3.38                           | 3.38             | 0.81                     |
| Upper critical value, $UCV$               | 1.5226                                | 1.8778                         | 1003.1           | 0.8229                   |
| Lower critical value, $LCV$               | 1.4302                                | 1.7492                         | 934.4            | 0.8091                   |

  

| Statistical parameters                    | Thermal properties of sample GS1Fe1.0 |                                |                  |                          |
|-------------------------------------------|---------------------------------------|--------------------------------|------------------|--------------------------|
|                                           | $\lambda$ [W/(m·K)]                   | $C_v$ [MJ/(m <sup>3</sup> ·K)] | $C_p$ [J/(kg·K)] | $a$ [mm <sup>2</sup> /s] |
| Quartile, $Q1$                            | 1.0000                                | 1.5068                         | 817.1            | 0.6222                   |
| Median, $M$                               | 1.0311                                | 1.6300                         | 883.9            | 0.6436                   |
| Quartile, $Q3$                            | 1.0618                                | 1.7053                         | 924.8            | 0.6640                   |
| Interquartile range, $IQR = (Q3 - Q1)$    | 0.0618                                | 0.1985                         | 107.7            | 0.0418                   |
| Higher outlier, $HO = Q3 + 1.5 \cdot IQR$ | 1.1545                                | 2.0031                         | 1086.3           | 0.7267                   |
| Lower outlier, $LO = Q1 - 1.5 \cdot IQR$  | 0.9073                                | 1.2091                         | 655.7            | 0.5595                   |
| Average value, $\bar{X}$                  | 1.0311                                | 1.6145                         | 875.5            | 0.6432                   |
| Standard deviation, $s$                   | 0.0337                                | 0.1017                         | 55.2             | 0.0228                   |
| Coefficient of variation, $CV$ [%]        | 3.27                                  | 6.30                           | 6.30             | 3.54                     |
| Upper critical value, $UCV$               | 1.0664                                | 1.7212                         | 933.4            | 0.6672                   |
| Lower critical value, $LCV$               | 0.9957                                | 1.5077                         | 817.6            | 0.6193                   |

  

| Statistical parameters | Thermal properties of sample GS1Fe1.5 |                                |                     |                             |
|------------------------|---------------------------------------|--------------------------------|---------------------|-----------------------------|
|                        | $\lambda$<br>[W/(m·K)]                | $C_v$ [MJ/(m <sup>3</sup> ·K)] | $C_p$<br>[J/(kg·K)] | $a$<br>[mm <sup>2</sup> /s] |
| Quartile, $Q1$         | 1.1470                                | 1.6591                         | 891.9               | 0.6920                      |

|                                            |        |        |       |        |
|--------------------------------------------|--------|--------|-------|--------|
| Median, $M$                                | 1.2550 | 1.6631 | 894.1 | 0.7422 |
| Quartile, $Q_3$                            | 1.3584 | 1.7153 | 922.2 | 0.7944 |
| Interquartile range, $IQR = (Q_3 - Q_1)$   | 0.2114 | 0.0562 | 30.3  | 0.1024 |
| Higher outlier, $HO = Q_3 + 1.5 \cdot IQR$ | 1.6755 | 1.7996 | 967.5 | 0.9480 |
| Lower outlier, $LO = Q_1 - 1.5 \cdot IQR$  | 0.8299 | 1.5748 | 846.7 | 0.5384 |
| Average value, $\bar{X}$                   | 1.2559 | 1.6811 | 903.8 | 0.7465 |
| Standard deviation, $s$                    | 0.1156 | 0.0322 | 17.3  | 0.0591 |
| Coefficient of variation, $CV$ [%]         | 9.20   | 1.92   | 1.92  | 7.92   |
| Upper critical value, $UCV$                | 1.3772 | 1.7149 | 922.0 | 0.8086 |
| Lower critical value, $LCV$                | 1.1346 | 1.6473 | 885.7 | 0.6844 |

| Statistical parameters                     | Thermal properties of sample GS1Fe2.0 |                                |                  |                          |
|--------------------------------------------|---------------------------------------|--------------------------------|------------------|--------------------------|
|                                            | $\lambda$ [W/(m·K)]                   | $C_v$ [MJ/(m <sup>3</sup> ·K)] | $C_p$ [J/(kg·K)] | $a$ [mm <sup>2</sup> /s] |
| Quartile, $Q_1$                            | 1.0129                                | 1.7173                         | 915.4            | 0.5895                   |
| Median, $M$                                | 1.1153                                | 1.7196                         | 916.6            | 0.6481                   |
| Quartile, $Q_3$                            | 1.2175                                | 1.7210                         | 917.4            | 0.7078                   |
| Interquartile range, $IQR = (Q_3 - Q_1)$   | 0.2046                                | 0.0037                         | 2.0              | 0.1183                   |
| Higher outlier, $HO = Q_3 + 1.5 \cdot IQR$ | 1.5244                                | 1.7266                         | 920.3            | 0.8853                   |
| Lower outlier, $LO = Q_1 - 1.5 \cdot IQR$  | 0.7060                                | 1.7118                         | 912.4            | 0.4121                   |
| Average value, $\bar{X}$                   | 1.1159                                | 1.7195                         | 916.6            | 0.6488                   |
| Standard deviation, $s$                    | 0.1128                                | 0.0022                         | 1.1              | 0.0650                   |
| Coefficient of variation, $CV$ [%]         | 10.11                                 | 0.13                           | 0.13             | 10.02                    |
| Upper critical value, $UCV$                | 1.2343                                | 1.7217                         | 917.8            | 0.7171                   |
| Lower critical value, $LCV$                | 0.9975                                | 1.7172                         | 915.4            | 0.5806                   |

| Statistical parameters                     | Thermal properties of sample GS1Fe2.5 |                                |                  |                          |
|--------------------------------------------|---------------------------------------|--------------------------------|------------------|--------------------------|
|                                            | $\lambda$ [W/(m·K)]                   | $C_v$ [MJ/(m <sup>3</sup> ·K)] | $C_p$ [J/(kg·K)] | $a$ [mm <sup>2</sup> /s] |
| Quartile, $Q_1$                            | 1.0483                                | 1.6348                         | 869.6            | 0.6361                   |
| Median, $M$                                | 1.0480                                | 1.6420                         | 873.4            | 0.6371                   |
| Quartile, $Q_3$                            | 1.0495                                | 1.6490                         | 877.1            | 0.6407                   |
| Interquartile range, $IQR = (Q_3 - Q_1)$   | 0.0012                                | 0.0142                         | 7.5              | 0.0046                   |
| Higher outlier, $HO = Q_3 + 1.5 \cdot IQR$ | 1.0584                                | 1.6703                         | 888.4            | 0.6476                   |
| Lower outlier, $LO = Q_1 - 1.5 \cdot IQR$  | 1.0348                                | 1.6135                         | 858.2            | 0.6292                   |
| Average value, $\bar{X}$                   | 1.0468                                | 1.6419                         | 873.4            | 0.6875                   |
| Standard deviation, $s$                    | 0.0036                                | 0.0085                         | 4.5              | 0.1230                   |
| Coefficient of variation, $CV$ [%]         | 0.34                                  | 0.52                           | 0.52             | 17.88                    |
| Upper critical value, $UCV$                | 1.0505                                | 1.6509                         | 878.1            | 0.8166                   |
| Lower critical value, $LCV$                | 1.0430                                | 1.6330                         | 868.6            | 0.5585                   |

**Table S2.** The obtained values of the thermal parameters of the geopolymers samples with sand (1:1.2), and the calculated statistical parameters after 28 days of conditioning in 20-22°C and a relative humidity of 52-54%

| Statistical parameters                     | Thermal properties of sample RSS1.2 |                                |                  |                          |
|--------------------------------------------|-------------------------------------|--------------------------------|------------------|--------------------------|
|                                            | $\lambda$ [W/(m·K)]                 | $C_v$ [MJ/(m <sup>3</sup> ·K)] | $C_p$ [J/(kg·K)] | $a$ [mm <sup>2</sup> /s] |
| Quartile, $Q_1$                            | 1.9462                              | 1.8685                         | 970.1            | 1.0361                   |
| Median, $M$                                | 1.9545                              | 1.8840                         | 978.2            | 1.0396                   |
| Quartile, $Q_3$                            | 1.9718                              | 1.8983                         | 985.6            | 1.0416                   |
| Interquartile range, $IQR = (Q_3 - Q_1)$   | 0.0256                              | 0.0298                         | 15.5             | 0.0055                   |
| Higher outlier, $HO = Q_3 + 1.5 \cdot IQR$ | 2.0102                              | 1.9430                         | 1008.8           | 1.0499                   |
| Lower outlier, $LO = Q_1 - 1.5 \cdot IQR$  | 1.9078                              | 1.8238                         | 946.9            | 1.0279                   |
| Average value, $\bar{X}$                   | 1.9573                              | 1.8843                         | 978.3            | 1.0388                   |
| Standard deviation, $s$                    | 0.0130                              | 0.0164                         | 8.5              | 0.0036                   |
| Coefficient of variation, $CV$ [%]         | 0.66                                | 0.87                           | 0.87             | 0.34                     |

|                                  |        |        |       |        |
|----------------------------------|--------|--------|-------|--------|
| Upper critical value, <i>UCV</i> | 1.9710 | 1.9015 | 987.3 | 1.0425 |
| Lower critical value, <i>LCV</i> | 1.9437 | 1.8671 | 969.4 | 1.0350 |

| Statistical parameters                                      | Thermal properties of sample GS1.2Fe0.5 |                                |                  |                          |
|-------------------------------------------------------------|-----------------------------------------|--------------------------------|------------------|--------------------------|
|                                                             | $\lambda$ [W/(m·K)]                     | $C_v$ [MJ/(m <sup>3</sup> ·K)] | $C_p$ [J/(kg·K)] | $a$ [mm <sup>2</sup> /s] |
| Quartile, <i>Q1</i>                                         | 1.1167                                  | 1.6136                         | 877.9            | 0.6920                   |
| Median, <i>M</i>                                            | 1.2758                                  | 1.0731                         | 926.6            | 0.7448                   |
| Quartile, <i>Q3</i>                                         | 1.4297                                  | 1.7939                         | 976.0            | 0.7978                   |
| Interquartile range, <i>IQR</i> = ( <i>Q3</i> - <i>Q1</i> ) | 0.3130                                  | 0.1803                         | 98.1             | 0.1058                   |
| Higher outlier, <i>HO</i> = <i>Q3</i> + 1.5· <i>IQR</i>     | 1.8992                                  | 2.0644                         | 1123.2           | 0.9565                   |
| Lower outlier, <i>LO</i> = <i>Q1</i> - 1.5· <i>IQR</i>      | 0.6472                                  | 1.3432                         | 730.8            | 0.5333                   |
| Average value, $\bar{X}$                                    | 1.2750                                  | 1.7044                         | 927.3            | 0.7452                   |
| Standard deviation, <i>s</i>                                | 0.1729                                  | 0.0993                         | 54.0             | 0.0581                   |
| Coefficient of variation, <i>CV</i> [%]                     | 13.56                                   | 5.83                           | 5.83             | 7.79                     |
| Upper critical value, <i>UCV</i>                            | 1.4564                                  | 1.8086                         | 984.0            | 0.8062                   |
| Lower critical value, <i>LCV</i>                            | 1.0935                                  | 1.6002                         | 870.6            | 0.6843                   |

| Statistical parameters                                      | Thermal properties of sample GS1.2Fe1.0 |                                |                  |                          |
|-------------------------------------------------------------|-----------------------------------------|--------------------------------|------------------|--------------------------|
|                                                             | $\lambda$ [W/(m·K)]                     | $C_v$ [MJ/(m <sup>3</sup> ·K)] | $C_p$ [J/(kg·K)] | $a$ [mm <sup>2</sup> /s] |
| Quartile, <i>Q1</i>                                         | 1.4332                                  | 1.6489                         | 876.1            | 0.8950                   |
| Median, <i>M</i>                                            | 1.4367                                  | 1.6922                         | 899.1            | 0.8960                   |
| Quartile, <i>Q3</i>                                         | 1.4370                                  | 1.7351                         | 921.9            | 0.8977                   |
| Interquartile range, <i>IQR</i> = ( <i>Q3</i> - <i>Q1</i> ) | 0.0038                                  | 0.0862                         | 45.8             | 0.0027                   |
| Higher outlier, <i>HO</i> = <i>Q3</i> + 1.5· <i>IQR</i>     | 1.4427                                  | 1.8644                         | 990.6            | 0.9018                   |
| Lower outlier, <i>LO</i> = <i>Q1</i> - 1.5· <i>IQR</i>      | 1.4275                                  | 1.5196                         | 807.4            | 0.8910                   |
| Average value, $\bar{X}$                                    | 1.4365                                  | 1.6987                         | 902.6            | 0.8965                   |
| Standard deviation, <i>s</i>                                | 0.0018                                  | 0.0568                         | 30.2             | 0.0016                   |
| Coefficient of variation, <i>CV</i> [%]                     | 0.12                                    | 3.34                           | 3.34             | 0.18                     |
| Upper critical value, <i>UCV</i>                            | 1.4384                                  | 1.7583                         | 934.3            | 0.8982                   |
| Lower critical value, <i>LCV</i>                            | 1.4347                                  | 1.6391                         | 870.9            | 0.8947                   |

| Statistical parameters                                      | Thermal properties of sample GS1.2Fe1.5 |                                |                  |                          |
|-------------------------------------------------------------|-----------------------------------------|--------------------------------|------------------|--------------------------|
|                                                             | $\lambda$ [W/(m·K)]                     | $C_v$ [MJ/(m <sup>3</sup> ·K)] | $C_p$ [J/(kg·K)] | $a$ [mm <sup>2</sup> /s] |
| Quartile, <i>Q1</i>                                         | 1.8236                                  | 1.7206                         | 895.2            | 0.9214                   |
| Median, <i>M</i>                                            | 1.8304                                  | 1.9809                         | 1030.6           | 0.9519                   |
| Quartile, <i>Q3</i>                                         | 1.9002                                  | 1.9861                         | 1033.4           | 0.9854                   |
| Interquartile range, <i>IQR</i> = ( <i>Q3</i> - <i>Q1</i> ) | 0.0766                                  | 0.2655                         | 138.2            | 0.0640                   |
| Higher outlier, <i>HO</i> = <i>Q3</i> + 1.5· <i>IQR</i>     | 2.0151                                  | 2.3844                         | 1240.6           | 1.0814                   |
| Lower outlier, <i>LO</i> = <i>Q1</i> - 1.5· <i>IQR</i>      | 1.7087                                  | 1.3224                         | 688.0            | 0.8254                   |
| Average value, $\bar{X}$                                    | 1.7681                                  | 1.8864                         | 981.5            | 0.9466                   |
| Standard deviation, <i>s</i>                                | 0.0601                                  | 0.1564                         | 81.4             | 0.0746                   |
| Coefficient of variation, <i>CV</i> [%]                     | 3.40                                    | 8.29                           | 8.29             | 7.88                     |
| Upper critical value, <i>UCV</i>                            | 1.8362                                  | 2.0505                         | 1066.9           | 1.0311                   |
| Lower critical value, <i>LCV</i>                            | 1.7000                                  | 1.7223                         | 896.1            | 0.8620                   |

| Statistical parameters                                      | Thermal properties of sample GS1.2Fe2.0 |                                |                  |                          |
|-------------------------------------------------------------|-----------------------------------------|--------------------------------|------------------|--------------------------|
|                                                             | $\lambda$ [W/(m·K)]                     | $C_v$ [MJ/(m <sup>3</sup> ·K)] | $C_p$ [J/(kg·K)] | $a$ [mm <sup>2</sup> /s] |
| Quartile, <i>Q1</i>                                         | 1.2291                                  | 1.5890                         | 805.0            | 0.6879                   |
| Median, <i>M</i>                                            | 1.3223                                  | 1.6869                         | 854.5            | 0.7903                   |
| Quartile, <i>Q3</i>                                         | 1.4197                                  | 1.7851                         | 904.3            | 0.8932                   |
| Interquartile range, <i>IQR</i> = ( <i>Q3</i> - <i>Q1</i> ) | 0.1906                                  | 0.1961                         | 99.3             | 0.2053                   |
| Higher outlier, <i>HO</i> = <i>Q3</i> + 1.5· <i>IQR</i>     | 1.7056                                  | 2.0793                         | 1053.3           | 1.2012                   |
| Lower outlier, <i>LO</i> = <i>Q1</i> - 1.5· <i>IQR</i>      | 0.9432                                  | 1.2949                         | 656.0            | 0.3800                   |

|                                    |        |        |       |        |
|------------------------------------|--------|--------|-------|--------|
| Average value, $\bar{X}$           | 1.3239 | 1.6871 | 854.6 | 0.7906 |
| Standard deviation, $s$            | 0.1043 | 0.1068 | 54.1  | 0.1119 |
| Coefficient of variation, $CV$ [%] | 7.87   | 6.33   | 6.33  | 14.15  |
| Upper critical value, $UCV$        | 1.4333 | 1.7992 | 911.4 | 0.9080 |
| Lower critical value, $LCV$        | 1.2145 | 1.5750 | 797.8 | 0.6733 |

| Statistical parameters                    | Thermal properties of sample GS1.2Fe2.5 |                                |                  |                          |
|-------------------------------------------|-----------------------------------------|--------------------------------|------------------|--------------------------|
|                                           | $\lambda$ [W/(m·K)]                     | $C_v$ [MJ/(m <sup>3</sup> ·K)] | $C_p$ [J/(kg·K)] | $a$ [mm <sup>2</sup> /s] |
| Quartile, $Q1$                            | 1.3620                                  | 1.6516                         | 827.0            | 0.8070                   |
| Median, $M$                               | 1.4290                                  | 1.6682                         | 835.4            | 0.8573                   |
| Quartile, $Q3$                            | 1.4999                                  | 1.6852                         | 843.9            | 0.9076                   |
| Interquartile range, $IQR = (Q3 - Q1)$    | 0.1379                                  | 0.0336                         | 16.9             | 0.1006                   |
| Higher outlier, $HO = Q3 + 1.5 \cdot IQR$ | 1.7068                                  | 1.7356                         | 869.1            | 1.0585                   |
| Lower outlier, $LO = Q1 - 1.5 \cdot IQR$  | 1.1552                                  | 1.6012                         | 801.8            | 0.6561                   |
| Average value, $\bar{X}$                  | 1.4300                                  | 1.6686                         | 835.6            | 0.8574                   |
| Standard deviation, $s$                   | 0.0745                                  | 1.6686                         | 9.3              | 0.0540                   |
| Coefficient of variation, $CV$ [%]        | 5.21                                    | 1.11                           | 1.11             | 6.30                     |
| Upper critical value, $UCV$               | 1.5082                                  | 1.6881                         | 845.3            | 0.9141                   |
| Lower critical value, $LCV$               | 1.3518                                  | 1.6491                         | 825.8            | 0.8007                   |

**Table S3.** The obtained values of the thermal parameters of the geopolymer samples with fireclay (1:1), and the calculated statistical parameters after 28 days of conditioning in 20-22°C and a relative humidity of 52-54%

| Statistical parameters                    | Thermal properties of sample RSF1 |                                |                  |                          |
|-------------------------------------------|-----------------------------------|--------------------------------|------------------|--------------------------|
|                                           | $\lambda$ [W/(m·K)]               | $C_v$ [MJ/(m <sup>3</sup> ·K)] | $C_p$ [J/(kg·K)] | $a$ [mm <sup>2</sup> /s] |
| Quartile, $Q1$                            | 0.9754                            | 1.7171                         | 891.5            | 0.5506                   |
| Median, $M$                               | 0.9898                            | 1.7643                         | 916.0            | 0.5607                   |
| Quartile, $Q3$                            | 0.9974                            | 1.8110                         | 940.3            | 0.5689                   |
| Interquartile range, $IQR = (Q3 - Q1)$    | 0.0220                            | 0.0939                         | 48.8             | 0.0183                   |
| Higher outlier, $HO = Q3 + 1.5 \cdot IQR$ | 1.9519                            | 1.9519                         | 1013.4           | 0.5964                   |
| Lower outlier, $LO = Q1 - 1.5 \cdot IQR$  | 0.9424                            | 1.5763                         | 818.4            | 0.5232                   |
| Average value, $\bar{X}$                  | 0.9538                            | 1.7633                         | 915.5            | 0.5609                   |
| Standard deviation, $s$                   | 0.0916                            | 0.0508                         | 26.4             | 0.0103                   |
| Coefficient of variation, $CV$ [%]        | 9.60                              | 2.88                           | 2.88             | 1.84                     |
| Upper critical value, $UCV$               | 1.0576                            | 1.8166                         | 943.2            | 0.5717                   |
| Lower critical value, $LCV$               | 0.8500                            | 1.7100                         | 887.8            | 0.5500                   |

| Statistical parameters                    | Thermal properties of sample GF1Fe0.5 |                                |                  |                          |
|-------------------------------------------|---------------------------------------|--------------------------------|------------------|--------------------------|
|                                           | $\lambda$ [W/(m·K)]                   | $C_v$ [MJ/(m <sup>3</sup> ·K)] | $C_p$ [J/(kg·K)] | $a$ [mm <sup>2</sup> /s] |
| Quartile, $Q1$                            | 0.7887                                | 1.6879                         | 904.6            | 0.4651                   |
| Median, $M$                               | 0.8202                                | 1.6931                         | 907.3            | 0.4866                   |
| Quartile, $Q3$                            | 0.8659                                | 1.7160                         | 919.6            | 0.5035                   |
| Interquartile range, $IQR = (Q3 - Q1)$    | 0.0772                                | 0.0281                         | 15.0             | 0.0384                   |
| Higher outlier, $HO = Q3 + 1.5 \cdot IQR$ | 0.9817                                | 1.7582                         | 942.2            | 0.5611                   |
| Lower outlier, $LO = Q1 - 1.5 \cdot IQR$  | 0.6729                                | 1.6458                         | 882.0            | 0.4075                   |
| Average value, $\bar{X}$                  | 0.8270                                | 1.7013                         | 911.7            | 0.4804                   |
| Standard deviation, $s$                   | 0.0182                                | 0.0045                         | 2.4              | 0.0245                   |
| Coefficient of variation, $CV$ [%]        | 2.20                                  | 0.27                           | 0.27             | 5.11                     |
| Upper critical value, $UCV$               | 0.8442                                | 1.7055                         | 914.0            | 0.5035                   |
| Lower critical value, $LCV$               | 0.8099                                | 1.6970                         | 909.4            | 0.4573                   |

| Statistical parameters | Thermal properties of sample GF1Fe1.0 |                                |                  |                          |
|------------------------|---------------------------------------|--------------------------------|------------------|--------------------------|
|                        | $\lambda$ [W/(m·K)]                   | $C_v$ [MJ/(m <sup>3</sup> ·K)] | $C_p$ [J/(kg·K)] | $a$ [mm <sup>2</sup> /s] |

|                                           |        |        |        |        |
|-------------------------------------------|--------|--------|--------|--------|
| Quartile, $Q1$                            | 0.9112 | 1.5917 | 832.5  | 0.5122 |
| Median, $M$                               | 0.9286 | 1.6856 | 881.6  | 0.5529 |
| Quartile, $Q3$                            | 0.9457 | 1.7792 | 930.5  | 0.5943 |
| Interquartile range, $IQR = (Q3 - Q1)$    | 0.0345 | 0.1875 | 98.0   | 0.0821 |
| Higher outlier, $HO = Q3 + 1.5 \cdot IQR$ | 0.9975 | 2.0605 | 1077.6 | 0.7175 |
| Lower outlier, $LO = Q1 - 1.5 \cdot IQR$  | 0.8595 | 1.3105 | 685.4  | 0.3891 |
| Average value, $\bar{X}$                  | 0.9286 | 1.6851 | 881.3  | 0.5533 |
| Standard deviation, $s$                   | 0.0188 | 0.1028 | 53.8   | 0.0449 |
| Coefficient of variation, $CV [\%]$       | 2.02   | 2.57   | 2.57   | 8.12   |
| Upper critical value, $UCV$               | 0.9483 | 1.7931 | 937.8  | 0.6005 |
| Lower critical value, $LCV$               | 0.9089 | 1.5772 | 824.9  | 0.5062 |

| Statistical parameters                    | Thermal properties of sample GF1Fe1.5 |                                |                  |                          |
|-------------------------------------------|---------------------------------------|--------------------------------|------------------|--------------------------|
|                                           | $\lambda$ [W/(m·K)]                   | $C_v$ [MJ/(m <sup>3</sup> ·K)] | $C_p$ [J/(kg·K)] | $a$ [mm <sup>2</sup> /s] |
| Quartile, $Q1$                            | 0.8010                                | 1.6111                         | 838.7            | 0.4696                   |
| Median, $M$                               | 0.9047                                | 1.6598                         | 864.0            | 0.5424                   |
| Quartile, $Q3$                            | 0.9857                                | 1.7102                         | 890.3            | 0.6118                   |
| Interquartile range, $IQR = (Q3 - Q1)$    | 0.1847                                | 0.0991                         | 51.6             | 0.1422                   |
| Higher outlier, $HO = Q3 + 1.5 \cdot IQR$ | 1.2628                                | 1.8589                         | 967.6            | 0.8251                   |
| Lower outlier, $LO = Q1 - 1.5 \cdot IQR$  | 0.5240                                | 1.4625                         | 761.3            | 0.2563                   |
| Average value, $\bar{X}$                  | 0.8972                                | 1.6647                         | 866.6            | 0.5412                   |
| Standard deviation, $s$                   | 0.0969                                | 0.0590                         | 30.7             | 0.0768                   |
| Coefficient of variation, $CV [\%]$       | 10.80                                 | 3.55                           | 3.55             | 14.20                    |
| Upper critical value, $UCV$               | 0.9988                                | 1.7266                         | 898.8            | 0.6218                   |
| Lower critical value, $LCV$               | 0.7955                                | 1.6027                         | 834.3            | 0.4605                   |

| Statistical parameters                    | Thermal properties of sample GF1Fe2.0 |                                |                  |                          |
|-------------------------------------------|---------------------------------------|--------------------------------|------------------|--------------------------|
|                                           | $\lambda$ [W/(m·K)]                   | $C_v$ [MJ/(m <sup>3</sup> ·K)] | $C_p$ [J/(kg·K)] | $a$ [mm <sup>2</sup> /s] |
| Quartile, $Q1$                            | 0.8769                                | 1.7455                         | 904.4            | 0.4963                   |
| Median, $M$                               | 0.8858                                | 1.7727                         | 918.5            | 0.4984                   |
| Quartile, $Q3$                            | 0.8938                                | 1.7996                         | 932.4            | 0.5021                   |
| Interquartile range, $IQR = (Q3 - Q1)$    | 0.0169                                | 0.0541                         | 28.0             | 0.0058                   |
| Higher outlier, $HO = Q3 + 1.5 \cdot IQR$ | 0.9192                                | 1.8808                         | 974.5            | 0.5108                   |
| Lower outlier, $LO = Q1 - 1.5 \cdot IQR$  | 0.8516                                | 1.6644                         | 862.4            | 0.4876                   |
| Average value, $\bar{X}$                  | 0.8851                                | 1.7726                         | 918.4            | 0.4844                   |
| Standard deviation, $s$                   | 0.0099                                | 0.0298                         | 15.4             | 0.0378                   |
| Coefficient of variation, $CV [\%]$       | 1.12                                  | 1.68                           | 1.68             | 7.81                     |
| Upper critical value, $UCV$               | 0.8954                                | 1.8038                         | 934.6            | 0.5240                   |
| Lower critical value, $LCV$               | 0.8747                                | 1.7413                         | 902.2            | 0.4447                   |

| Statistical parameters                    | Thermal properties of sample GF1Fe2.5 |                                |                  |                          |
|-------------------------------------------|---------------------------------------|--------------------------------|------------------|--------------------------|
|                                           | $\lambda$ [W/(m·K)]                   | $C_v$ [MJ/(m <sup>3</sup> ·K)] | $C_p$ [J/(kg·K)] | $a$ [mm <sup>2</sup> /s] |
| Quartile, $Q1$                            | 0.9175                                | 1.7269                         | 898.5            | 0.4651                   |
| Median, $M$                               | 0.9259                                | 1.7337                         | 902.0            | 0.4866                   |
| Quartile, $Q3$                            | 0.9744                                | 1.8697                         | 972.8            | 0.5035                   |
| Interquartile range, $IQR = (Q3 - Q1)$    | 0.0569                                | 0.1428                         | 74.3             | 0.0384                   |
| Higher outlier, $HO = Q3 + 1.5 \cdot IQR$ | 1.0598                                | 2.0839                         | 1084.2           | 0.5611                   |
| Lower outlier, $LO = Q1 - 1.5 \cdot IQR$  | 0.8322                                | 1.5127                         | 787.0            | 0.4075                   |
| Average value, $\bar{X}$                  | 0.9372                                | 1.7586                         | 915.0            | 0.4804                   |
| Standard deviation, $s$                   | 0.0259                                | 0.0627                         | 32.6             | 0.0273                   |
| Coefficient of variation, $CV [\%]$       | 2.76                                  | 3.56                           | 3.56             | 5.67                     |
| Upper critical value, $UCV$               | 0.9616                                | 1.8176                         | 945.7            | 0.5061                   |
| Lower critical value, $LCV$               | 0.9129                                | 1.6996                         | 884.3            | 0.4548                   |

**Table S4.** The obtained values of the thermal parameters of the geopolymer samples with fireclay (1:1.2), and the calculated statistical parameters after 28 days of conditioning in 20-22°C and a relative humidity of 52-54%

| Statistical parameters                    | Thermal properties of sample RSF1.2 |                                |                  |                          |
|-------------------------------------------|-------------------------------------|--------------------------------|------------------|--------------------------|
|                                           | $\lambda$ [W/(m·K)]                 | $C_v$ [MJ/(m <sup>3</sup> ·K)] | $C_p$ [J/(kg·K)] | $a$ [mm <sup>2</sup> /s] |
| Quartile, $Q1$                            | 0.9431                              | 1.6776                         | 876.5            | 0.5230                   |
| Median, $M$                               | 0.9477                              | 1.7441                         | 911.2            | 0.5429                   |
| Quartile, $Q3$                            | 0.9497                              | 1.8134                         | 947.4            | 0.5632                   |
| Interquartile range, $IQR = (Q3 - Q1)$    | 0.0066                              | 0.1358                         | 70.9             | 0.0402                   |
| Higher outlier, $HO = Q3 + 1.5 \cdot IQR$ | 0.9596                              | 2.0171                         | 1053.9           | 0.6235                   |
| Lower outlier, $LO = Q1 - 1.5 \cdot IQR$  | 0.9332                              | 1.4739                         | 770.1            | 0.4627                   |
| Average value, $\bar{X}$                  | 0.9479                              | 1.7448                         | 911.6            | 0.5441                   |
| Standard deviation, $s$                   | 0.0052                              | 0.0745                         | 38.9             | 0.0232                   |
| Coefficient of variation, $CV$ [%]        | 0.55                                | 4.27                           | 4.27             | 4.26                     |
| Upper critical value, $UCV$               | 0.9534                              | 1.8230                         | 952.5            | 0.5684                   |
| Lower critical value, $LCV$               | 0.9425                              | 1.6666                         | 870.7            | 0.5198                   |

  

| Statistical parameters                    | Thermal properties of sample GF1.2Fe0.5 |                                |                  |                          |
|-------------------------------------------|-----------------------------------------|--------------------------------|------------------|--------------------------|
|                                           | $\lambda$ [W/(m·K)]                     | $C_v$ [MJ/(m <sup>3</sup> ·K)] | $C_p$ [J/(kg·K)] | $a$ [mm <sup>2</sup> /s] |
| Quartile, $Q1$                            | 0.9490                                  | 1.8280                         | 925.1            | 0.5054                   |
| Median, $M$                               | 0.9516                                  | 1.8541                         | 938.3            | 0.5120                   |
| Quartile, $Q3$                            | 0.9534                                  | 1.8839                         | 953.4            | 0.5213                   |
| Interquartile range, $IQR = (Q3 - Q1)$    | 0.0044                                  | 0.0559                         | 28.3             | 0.0159                   |
| Higher outlier, $HO = Q3 + 1.5 \cdot IQR$ | 0.9600                                  | 1.9678                         | 995.8            | 0.5453                   |
| Lower outlier, $LO = Q1 - 1.5 \cdot IQR$  | 0.9424                                  | 1.7442                         | 882.7            | 0.4816                   |
| Average value, $\bar{X}$                  | 0.9512                                  | 1.8549                         | 938.7            | 0.5129                   |
| Standard deviation, $s$                   | 0.0042                                  | 0.0303                         | 15.3             | 0.0077                   |
| Coefficient of variation, $CV$ [%]        | 0.44                                    | 1.63                           | 1.63             | 1.51                     |
| Upper critical value, $UCV$               | 0.9556                                  | 1.8866                         | 954.8            | 0.5210                   |
| Lower critical value, $LCV$               | 0.9468                                  | 1.8231                         | 922.6            | 0.5048                   |

  

| Statistical parameters                    | Thermal properties of sample GF1.2Fe1.0 |                                |                  |                          |
|-------------------------------------------|-----------------------------------------|--------------------------------|------------------|--------------------------|
|                                           | $\lambda$ [W/(m·K)]                     | $C_v$ [MJ/(m <sup>3</sup> ·K)] | $C_p$ [J/(kg·K)] | $a$ [mm <sup>2</sup> /s] |
| Quartile, $Q1$                            | 1.0003                                  | 1.6214                         | 850.7            | 0.5259                   |
| Median, $M$                               | 1.0007                                  | 1.7623                         | 924.6            | 0.5725                   |
| Quartile, $Q3$                            | 1.0050                                  | 1.9026                         | 998.2            | 0.6174                   |
| Interquartile range, $IQR = (Q3 - Q1)$    | 0.0047                                  | 0.2812                         | 147.5            | 0.0915                   |
| Higher outlier, $HO = Q3 + 1.5 \cdot IQR$ | 1.0121                                  | 2.3244                         | 1219.5           | 0.7547                   |
| Lower outlier, $LO = Q1 - 1.5 \cdot IQR$  | 0.9933                                  | 1.1996                         | 629.4            | 0.3887                   |
| Average value, $\bar{X}$                  | 1.0019                                  | 1.7623                         | 924.6            | 0.5722                   |
| Standard deviation, $s$                   | 0.0026                                  | 0.1542                         | 80.9             | 0.0502                   |
| Coefficient of variation, $CV$ [%]        | 0.26                                    | 8.75                           | 8.75             | 8.77                     |
| Upper critical value, $UCV$               | 1.0046                                  | 1.9242                         | 1009.5           | 0.6248                   |
| Lower critical value, $LCV$               | 0.9991                                  | 1.6005                         | 839.7            | 0.5195                   |

  

| Statistical parameters                    | Thermal properties of sample GF1.2Fe1.5 |                                |                  |                          |
|-------------------------------------------|-----------------------------------------|--------------------------------|------------------|--------------------------|
|                                           | $\lambda$ [W/(m·K)]                     | $C_v$ [MJ/(m <sup>3</sup> ·K)] | $C_p$ [J/(kg·K)] | $a$ [mm <sup>2</sup> /s] |
| Quartile, $Q1$                            | 0.9569                                  | 1.7284                         | 869.4            | 0.5477                   |
| Median, $M$                               | 0.9596                                  | 1.7389                         | 874.7            | 0.5515                   |
| Quartile, $Q3$                            | 0.9607                                  | 1.7651                         | 887.9            | 0.5542                   |
| Interquartile range, $IQR = (Q3 - Q1)$    | 0.0038                                  | 0.0367                         | 18.5             | 0.0065                   |
| Higher outlier, $HO = Q3 + 1.5 \cdot IQR$ | 0.9664                                  | 1.8202                         | 915.6            | 0.5640                   |
| Lower outlier, $LO = Q1 - 1.5 \cdot IQR$  | 0.9512                                  | 1.6734                         | 841.7            | 0.5380                   |

|                                    |        |        |       |        |
|------------------------------------|--------|--------|-------|--------|
| Average value, $\bar{X}$           | 0.9600 | 1.7438 | 877.2 | 0.5506 |
| Standard deviation, $s$            | 0.0037 | 0.0186 | 9.3   | 0.0043 |
| Coefficient of variation, $CV$ [%] | 0.38   | 1.06   | 1.06  | 0.78   |
| Upper critical value, $UCV$        | 0.9639 | 1.7633 | 887.0 | 0.5551 |
| Lower critical value, $LCV$        | 0.9561 | 1.7243 | 867.4 | 0.5461 |

| Statistical parameters                    | Thermal properties of sample GF1.2Fe2.0 |                                |                  |                          |
|-------------------------------------------|-----------------------------------------|--------------------------------|------------------|--------------------------|
|                                           | $\lambda$ [W/(m·K)]                     | $C_v$ [MJ/(m <sup>3</sup> ·K)] | $C_p$ [J/(kg·K)] | $a$ [mm <sup>2</sup> /s] |
| Quartile, $Q1$                            | 0.9117                                  | 1.5709                         | 809.7            | 0.5513                   |
| Median, $M$                               | 0.9139                                  | 1.6158                         | 832.9            | 0.5667                   |
| Quartile, $Q3$                            | 0.9159                                  | 1.6614                         | 856.4            | 0.5818                   |
| Interquartile range, $IQR = (Q3 - Q1)$    | 0.0042                                  | 0.0905                         | 46.7             | 0.0305                   |
| Higher outlier, $HO = Q3 + 1.5 \cdot IQR$ | 0.9222                                  | 1.7972                         | 926.4            | 0.6276                   |
| Lower outlier, $LO = Q1 - 1.5 \cdot IQR$  | 0.9054                                  | 1.4352                         | 739.8            | 0.5056                   |
| Average value, $\bar{X}$                  | 0.9551                                  | 1.6158                         | 832.9            | 0.5920                   |
| Standard deviation, $s$                   | 0.1028                                  | 0.0471                         | 24.3             | 0.0722                   |
| Coefficient of variation, $CV$ [%]        | 10.77                                   | 2.91                           | 2.91             | 12.19                    |
| Upper critical value, $UCV$               | 1.0716                                  | 1.6653                         | 858.4            | 0.6738                   |
| Lower critical value, $LCV$               | 0.8385                                  | 1.5664                         | 807.4            | 0.5102                   |

| Statistical parameters                    | Thermal properties of sample GF1.2Fe2.5 |                                |                  |                          |
|-------------------------------------------|-----------------------------------------|--------------------------------|------------------|--------------------------|
|                                           | $\lambda$ [W/(m·K)]                     | $C_v$ [MJ/(m <sup>3</sup> ·K)] | $C_p$ [J/(kg·K)] | $a$ [mm <sup>2</sup> /s] |
| Quartile, $Q1$                            | 0.9391                                  | 1.5699                         | 796.9            | 0.5203                   |
| Median, $M$                               | 0.9480                                  | 1.7039                         | 864.9            | 0.5598                   |
| Quartile, $Q3$                            | 0.9579                                  | 1.8409                         | 934.5            | 0.5980                   |
| Interquartile range, $IQR = (Q3 - Q1)$    | 0.0188                                  | 0.2710                         | 137.6            | 0.0777                   |
| Higher outlier, $HO = Q3 + 1.5 \cdot IQR$ | 0.9861                                  | 2.2474                         | 1140.8           | 0.7146                   |
| Lower outlier, $LO = Q1 - 1.5 \cdot IQR$  | 0.9109                                  | 1.1634                         | 590.6            | 0.4038                   |
| Average value, $\bar{X}$                  | 0.9484                                  | 1.7049                         | 865.4            | 0.5593                   |
| Standard deviation, $s$                   | 0.0099                                  | 0.1478                         | 75.0             | 0.0427                   |
| Coefficient of variation, $CV$ [%]        | 1.04                                    | 8.67                           | 8.67             | 7.64                     |
| Upper critical value, $UCV$               | 0.9588                                  | 1.8600                         | 944.2            | 0.6041                   |
| Lower critical value, $LCV$               | 0.9380                                  | 1.5498                         | 786.7            | 0.5145                   |

**Table S5.** The obtained values of the thermal parameters of the geopolymer samples with sand (1:1), and the calculated statistical parameters after 3 days of conditioning in 60°C

| Statistical parameters                    | Thermal properties of sample RSS1 |                                |                  |                          |
|-------------------------------------------|-----------------------------------|--------------------------------|------------------|--------------------------|
|                                           | $\lambda$ [W/(m·K)]               | $C_v$ [MJ/(m <sup>3</sup> ·K)] | $C_p$ [J/(kg·K)] | $a$ [mm <sup>2</sup> /s] |
| Quartile, $Q1$                            | 0.9621                            | 1.8099                         | 976.2            | 0.5313                   |
| Median, $M$                               | 0.9628                            | 1.8106                         | 976.6            | 0.5323                   |
| Quartile, $Q3$                            | 0.9638                            | 1.8118                         | 977.2            | 0.5362                   |
| Interquartile range, $IQR = (Q3 - Q1)$    | 0.0017                            | 0.0019                         | 1.0              | 0.0049                   |
| Higher outlier, $HO = Q3 + 1.5 \cdot IQR$ | 0.9655                            | 1.8137                         | 978.3            | 0.5411                   |
| Lower outlier, $LO = Q1 - 1.5 \cdot IQR$  | 0.9604                            | 1.8080                         | 975.2            | 0.5264                   |
| Average value, $\bar{X}$                  | 0.9657                            | 1.8108                         | 976.7            | 0.5333                   |
| Standard deviation, $s$                   | 0.0033                            | 0.0013                         | 0.7              | 0.0025                   |
| Coefficient of variation, $CV$ [%]        | 0.35%                             | 0.07                           | 0.07             | 0.47                     |
| Upper critical value, $UCV$               | 0.9691                            | 1.8122                         | 977.4            | 0.5359                   |
| Lower critical value, $LCV$               | 0.9622                            | 1.8094                         | 976.0            | 0.5307                   |

| Statistical parameters | Thermal properties of sample GS1Fe0.5 |                                |                  |                          |
|------------------------|---------------------------------------|--------------------------------|------------------|--------------------------|
|                        | $\lambda$ [W/(m·K)]                   | $C_v$ [MJ/(m <sup>3</sup> ·K)] | $C_p$ [J/(kg·K)] | $a$ [mm <sup>2</sup> /s] |

|                                           |        |        |       |        |
|-------------------------------------------|--------|--------|-------|--------|
| Quartile, $Q1$                            | 0.9401 | 1.5940 | 866.2 | 0.5895 |
| Median, $M$                               | 0.9455 | 1.5941 | 866.3 | 0.5964 |
| Quartile, $Q3$                            | 0.9508 | 1.5945 | 866.4 | 0.5990 |
| Interquartile range, $IQR = (Q3 - Q1)$    | 0.0107 | 0.0005 | 0.2   | 0.0095 |
| Higher outlier, $HO = Q3 + 1.5 \cdot IQR$ | 0.9615 | 1.5950 | 866.6 | 0.6085 |
| Lower outlier, $LO = Q1 - 1.5 \cdot IQR$  | 0.9294 | 1.5935 | 866.0 | 0.5800 |
| Average value, $\bar{X}$                  | 0.9487 | 1.5942 | 866.4 | 0.5949 |
| Standard deviation, $s$                   | 0.0068 | 0.0004 | 0.1   | 0.0045 |
| Coefficient of variation, $CV [\%]$       | 0.72   | 0.02   | 0.02  | 0.76   |
| Upper critical value, $UCV$               | 0.9559 | 1.5946 | 866.6 | 0.5997 |
| Lower critical value, $LCV$               | 0.9416 | 1.5938 | 866.3 | 0.5902 |

| Statistical parameters                    | Thermal properties of sample GS1Fe1.0 |                          |                        |              |
|-------------------------------------------|---------------------------------------|--------------------------|------------------------|--------------|
|                                           | $\lambda [W/(m \cdot K)]$             | $C_v [MJ/(m^3 \cdot K)]$ | $C_p [J/(kg \cdot K)]$ | $a [mm^2/s]$ |
| Quartile, $Q1$                            | 0.9050                                | 1.7006                   | 935.4                  | 0.5325       |
| Median, $M$                               | 0.9070                                | 1.7007                   | 935.5                  | 0.5344       |
| Quartile, $Q3$                            | 0.9089                                | 1.7038                   | 935.5                  | 0.5351       |
| Interquartile range, $IQR = (Q3 - Q1)$    | 0.0039                                | 0.0032                   | 0.1                    | 0.0026       |
| Higher outlier, $HO = Q3 + 1.5 \cdot IQR$ | 0.9128                                | 1.7070                   | 935.6                  | 0.5377       |
| Lower outlier, $LO = Q1 - 1.5 \cdot IQR$  | 0.9011                                | 1.6974                   | 935.3                  | 0.5299       |
| Average value, $\bar{X}$                  | 0.9086                                | 1.7018                   | 936.1                  | 0.5340       |
| Standard deviation, $s$                   | 0.0029                                | 0.0017                   | 0.8                    | 0.0013       |
| Coefficient of variation, $CV [\%]$       | 0.32                                  | 0.10                     | 0.08                   | 0.25         |
| Upper critical value, $UCV$               | 0.9116                                | 1.7036                   | 936.9                  | 0.5353       |
| Lower critical value, $LCV$               | 0.9056                                | 1.6999                   | 935.2                  | 0.5326       |

| Statistical parameters                    | Thermal properties of sample GS1Fe1.5 |                          |                        |              |
|-------------------------------------------|---------------------------------------|--------------------------|------------------------|--------------|
|                                           | $\lambda [W/(m \cdot K)]$             | $C_v [MJ/(m^3 \cdot K)]$ | $C_p [J/(kg \cdot K)]$ | $a [mm^2/s]$ |
| Quartile, $Q1$                            | 1.0861                                | 1.6699                   | 906.6                  | 0.6497       |
| Median, $M$                               | 1.0869                                | 1.6738                   | 908.7                  | 0.6505       |
| Quartile, $Q3$                            | 1.0877                                | 1.7202                   | 933.9                  | 0.6531       |
| Interquartile range, $IQR = (Q3 - Q1)$    | 0.0016                                | 0.0503                   | 27.3                   | 0.0034       |
| Higher outlier, $HO = Q3 + 1.5 \cdot IQR$ | 1.0893                                | 1.7705                   | 961.2                  | 0.6565       |
| Lower outlier, $LO = Q1 - 1.5 \cdot IQR$  | 1.0845                                | 1.6196                   | 879.3                  | 0.6463       |
| Average value, $\bar{X}$                  | 1.0880                                | 1.6879                   | 916.3                  | 0.6511       |
| Standard deviation, $s$                   | 0.0015                                | 0.0254                   | 13.8                   | 0.0021       |
| Coefficient of variation, $CV [\%]$       | 0.14                                  | 1.50                     | 1.50                   | 0.32         |
| Upper critical value, $UCV$               | 1.0896                                | 1.7145                   | 930.8                  | 0.6533       |
| Lower critical value, $LCV$               | 1.0864                                | 1.6613                   | 901.9                  | 0.6489       |

| Statistical parameters                    | Thermal properties of sample GS1Fe2.0 |                          |                        |              |
|-------------------------------------------|---------------------------------------|--------------------------|------------------------|--------------|
|                                           | $\lambda [W/(m \cdot K)]$             | $C_v [MJ/(m^3 \cdot K)]$ | $C_p [J/(kg \cdot K)]$ | $a [mm^2/s]$ |
| Quartile, $Q1$                            | 0.8835                                | 1.6299                   | 921.9                  | 0.5424       |
| Median, $M$                               | 0.8857                                | 1.6325                   | 923.4                  | 0.5429       |
| Quartile, $Q3$                            | 0.8879                                | 1.6335                   | 923.9                  | 0.5438       |
| Interquartile range, $IQR = (Q3 - Q1)$    | 0.0044                                | 0.0036                   | 2.0                    | 0.0014       |
| Higher outlier, $HO = Q3 + 1.5 \cdot IQR$ | 0.8923                                | 1.6371                   | 926.0                  | 0.5452       |
| Lower outlier, $LO = Q1 - 1.5 \cdot IQR$  | 0.8791                                | 1.6263                   | 919.9                  | 0.5410       |
| Average value, $\bar{X}$                  | 0.8865                                | 1.6324                   | 923.3                  | 0.5595       |
| Standard deviation, $s$                   | 0.0023                                | 0.0024                   | 1.3                    | 0.0408       |
| Coefficient of variation, $CV [\%]$       | 0.26                                  | 0.15                     | 0.15                   | 7.29         |
| Upper critical value, $UCV$               | 0.8889                                | 1.6349                   | 924.7                  | 0.6023       |
| Lower critical value, $LCV$               | 0.8840                                | 1.6299                   | 921.9                  | 0.5167       |



| Statistical parameters                    | Thermal properties of sample GS1Fe2.5 |                                |                  |                          |
|-------------------------------------------|---------------------------------------|--------------------------------|------------------|--------------------------|
|                                           | $\lambda$ [W/(m·K)]                   | $C_v$ [MJ/(m <sup>3</sup> ·K)] | $C_p$ [J/(kg·K)] | $a$ [mm <sup>2</sup> /s] |
| Quartile, $Q1$                            | 0.9088                                | 1.6689                         | 900.2            | 0.5439                   |
| Median, $M$                               | 0.9102                                | 1.6694                         | 900.4            | 0.5454                   |
| Quartile, $Q3$                            | 0.9115                                | 1.6730                         | 902.4            | 0.5463                   |
| Interquartile range, $IQR = (Q3 - Q1)$    | 0.0027                                | 0.0041                         | 2.2              | 0.0024                   |
| Higher outlier, $HO = Q3 + 1.5 \cdot IQR$ | 0.9142                                | 1.6771                         | 904.6            | 0.5487                   |
| Lower outlier, $LO = Q1 - 1.5 \cdot IQR$  | 0.9061                                | 1.6648                         | 898.0            | 0.5415                   |
| Average value, $\bar{X}$                  | 0.9109                                | 1.6704                         | 901.0            | 0.5452                   |
| Standard deviation, $s$                   | 0.0013                                | 0.0025                         | 1.3              | 0.0013                   |
| Coefficient of variation, $CV$ [%]        | 0.14                                  | 0.15                           | 0.15             | 0.24                     |
| Upper critical value, $UCV$               | 0.9122                                | 1.6730                         | 902.4            | 0.5466                   |
| Lower critical value, $LCV$               | 0.9096                                | 1.6678                         | 899.6            | 0.5438                   |

**Table S6.** The obtained values of the thermal parameters of the geopolymer samples with sand (1:1.2), and the calculated statistical parameters after 3 days of conditioning in 60°C

| Statistical parameters                    | Thermal properties of sample RSS1.2 |                                |                  |                          |
|-------------------------------------------|-------------------------------------|--------------------------------|------------------|--------------------------|
|                                           | $\lambda$ [W/(m·K)]                 | $C_v$ [MJ/(m <sup>3</sup> ·K)] | $C_p$ [J/(kg·K)] | $a$ [mm <sup>2</sup> /s] |
| Quartile, $Q1$                            | 1.3755                              | 1.7892                         | 969.2            | 0.7684                   |
| Median, $M$                               | 1.3783                              | 1.7910                         | 970.2            | 0.7713                   |
| Quartile, $Q3$                            | 1.3805                              | 1.7913                         | 970.4            | 0.7718                   |
| Interquartile range, $IQR = (Q3 - Q1)$    | 0.0050                              | 0.0021                         | 1.1              | 0.0034                   |
| Higher outlier, $HO = Q3 + 1.5 \cdot IQR$ | 1.3855                              | 1.7934                         | 971.5            | 0.7752                   |
| Lower outlier, $LO = Q1 - 1.5 \cdot IQR$  | 1.3705                              | 1.7871                         | 968.1            | 0.7650                   |
| Average value, $\bar{X}$                  | 1.3791                              | 1.7906                         | 970.0            | 0.7706                   |
| Standard deviation, $s$                   | 0.0025                              | 0.0013                         | 0.7              | 0.0020                   |
| Coefficient of variation, $CV$ [%]        | 0.18                                | 0.07                           | 0.07             | 0.27                     |
| Upper critical value, $UCV$               | 1.3817                              | 1.7920                         | 970.7            | 0.7727                   |
| Lower critical value, $LCV$               | 1.3765                              | 1.7893                         | 969.3            | 0.7684                   |

| Statistical parameters                    | Thermal properties of sample GS1.2Fe0.5 |                                |                  |                          |
|-------------------------------------------|-----------------------------------------|--------------------------------|------------------|--------------------------|
|                                           | $\lambda$ [W/(m·K)]                     | $C_v$ [MJ/(m <sup>3</sup> ·K)] | $C_p$ [J/(kg·K)] | $a$ [mm <sup>2</sup> /s] |
| Quartile, $Q1$                            | 1.0215                                  | 1.6583                         | 910.2            | 0.6139                   |
| Median, $M$                               | 1.0230                                  | 1.6674                         | 915.1            | 0.6248                   |
| Quartile, $Q3$                            | 1.0245                                  | 1.6684                         | 915.7            | 0.6253                   |
| Interquartile range, $IQR = (Q3 - Q1)$    | 0.0030                                  | 0.0101                         | 5.5              | 0.0114                   |
| Higher outlier, $HO = Q3 + 1.5 \cdot IQR$ | 1.0275                                  | 1.6785                         | 921.2            | 0.6367                   |
| Lower outlier, $LO = Q1 - 1.5 \cdot IQR$  | 1.0185                                  | 1.6482                         | 904.6            | 0.6025                   |
| Average value, $\bar{X}$                  | 1.0296                                  | 1.6647                         | 913.7            | 0.6223                   |
| Standard deviation, $s$                   | 0.0089                                  | 0.0051                         | 2.8              | 0.0069                   |
| Coefficient of variation, $CV$ [%]        | 0.87                                    | 0.31                           | 0.31             | 1.11                     |
| Upper critical value, $UCV$               | 1.0389                                  | 1.6701                         | 916.6            | 0.6296                   |
| Lower critical value, $LCV$               | 1.0202                                  | 1.6594                         | 910.8            | 0.6150                   |

| Statistical parameters                    | Thermal properties of sample GS1.2Fe1.0 |                                |                  |                          |
|-------------------------------------------|-----------------------------------------|--------------------------------|------------------|--------------------------|
|                                           | $\lambda$ [W/(m·K)]                     | $C_v$ [MJ/(m <sup>3</sup> ·K)] | $C_p$ [J/(kg·K)] | $a$ [mm <sup>2</sup> /s] |
| Quartile, $Q1$                            | 0.9759                                  | 1.5503                         | 830.8            | 0.6307                   |
| Median, $M$                               | 1.0264                                  | 1.5506                         | 831.0            | 0.6944                   |
| Quartile, $Q3$                            | 1.0769                                  | 1.5510                         | 831.2            | 0.6951                   |
| Interquartile range, $IQR = (Q3 - Q1)$    | 0.1010                                  | 0.0007                         | 0.4              | 0.0644                   |
| Higher outlier, $HO = Q3 + 1.5 \cdot IQR$ | 1.1779                                  | 1.5517                         | 831.6            | 0.7595                   |

|                                          |        |        |       |        |
|------------------------------------------|--------|--------|-------|--------|
| Lower outlier, $LO = Q1 - 1.5 \cdot IQR$ | 0.8749 | 1.5496 | 830.4 | 0.5663 |
| Average value, $\bar{X}$                 | 1.0437 | 1.5502 | 830.7 | 0.6734 |
| Standard deviation, $s$                  | 0.0555 | 0.0015 | 0.8   | 0.0331 |
| Coefficient of variation, $CV$ [%]       | 5.32   | 0.10   | 0.10  | 4.92   |
| Upper critical value, $UCV$              | 1.1019 | 1.5517 | 831.6 | 0.7081 |
| Lower critical value, $LCV$              | 0.9854 | 1.5486 | 829.9 | 0.6386 |

| Statistical parameters                    | Thermal properties of sample GS1.2Fe1.5 |                                |                  |                          |
|-------------------------------------------|-----------------------------------------|--------------------------------|------------------|--------------------------|
|                                           | $\lambda$ [W/(m·K)]                     | $C_v$ [MJ/(m <sup>3</sup> ·K)] | $C_p$ [J/(kg·K)] | $a$ [mm <sup>2</sup> /s] |
| Quartile, $Q1$                            | 1.0521                                  | 1.6666                         | 896.0            | 0.6311                   |
| Median, $M$                               | 1.0528                                  | 1.6687                         | 897.1            | 0.6313                   |
| Quartile, $Q3$                            | 1.0548                                  | 1.6702                         | 898.0            | 0.6341                   |
| Interquartile range, $IQR = (Q3 - Q1)$    | 0.0027                                  | 0.0036                         | 1.9              | 0.0030                   |
| Higher outlier, $HO = Q3 + 1.5 \cdot IQR$ | 1.0575                                  | 1.6738                         | 899.9            | 0.6371                   |
| Lower outlier, $LO = Q1 - 1.5 \cdot IQR$  | 1.0494                                  | 1.6630                         | 894.1            | 0.6281                   |
| Average value, $\bar{X}$                  | 1.0542                                  | 1.6683                         | 896.9            | 0.6322                   |
| Standard deviation, $s$                   | 0.0018                                  | 0.0023                         | 1.2              | 0.0016                   |
| Coefficient of variation, $CV$ [%]        | 0.17                                    | 0.14                           | 0.14             | 0.25                     |
| Upper critical value, $UCV$               | 1.0560                                  | 1.6707                         | 898.2            | 0.6339                   |
| Lower critical value, $LCV$               | 1.0523                                  | 1.6659                         | 895.6            | 0.6305                   |

| Statistical parameters                    | Thermal properties of sample GS1.2Fe2.0 |                                |                  |                          |
|-------------------------------------------|-----------------------------------------|--------------------------------|------------------|--------------------------|
|                                           | $\lambda$ [W/(m·K)]                     | $C_v$ [MJ/(m <sup>3</sup> ·K)] | $C_p$ [J/(kg·K)] | $a$ [mm <sup>2</sup> /s] |
| Quartile, $Q1$                            | 1.1608                                  | 1.6137                         | 829.2            | 0.7384                   |
| Median, $M$                               | 1.1802                                  | 1.6159                         | 830.3            | 0.7269                   |
| Quartile, $Q3$                            | 1.1889                                  | 1.6181                         | 831.5            | 0.8139                   |
| Interquartile range, $IQR = (Q3 - Q1)$    | 0.0281                                  | 0.0044                         | 2.3              | 0.0755                   |
| Higher outlier, $HO = Q3 + 1.5 \cdot IQR$ | 1.2170                                  | 1.6225                         | 833.8            | 0.8894                   |
| Lower outlier, $LO = Q1 - 1.5 \cdot IQR$  | 1.1327                                  | 1.6093                         | 827.0            | 0.6629                   |
| Average value, $\bar{X}$                  | 1.1826                                  | 1.6158                         | 830.3            | 0.7596                   |
| Standard deviation, $s$                   | 0.0119                                  | 0.0037                         | 1.9              | 0.0428                   |
| Coefficient of variation, $CV$ [%]        | 1.01%                                   | 0.23%                          | 0.23%            | 5.63%                    |
| Upper critical value, $UCV$               | 1.1952                                  | 1.6196                         | 832.3            | 0.8045                   |
| Lower critical value, $LCV$               | 1.1701                                  | 1.6119                         | 828.3            | 0.7148                   |

| Statistical parameters                    | Thermal properties of sample GS1.2Fe2.5 |                                |                  |                          |
|-------------------------------------------|-----------------------------------------|--------------------------------|------------------|--------------------------|
|                                           | $\lambda$ [W/(m·K)]                     | $C_v$ [MJ/(m <sup>3</sup> ·K)] | $C_p$ [J/(kg·K)] | $a$ [mm <sup>2</sup> /s] |
| Quartile, $Q1$                            | 1.2000                                  | 1.6539                         | 846.9            | 0.7237                   |
| Median, $M$                               | 1.2005                                  | 1.6543                         | 847.0            | 0.7257                   |
| Quartile, $Q3$                            | 1.2012                                  | 1.6595                         | 849.7            | 0.7285                   |
| Interquartile range, $IQR = (Q3 - Q1)$    | 0.0012                                  | 0.0056                         | 2.9              | 0.0048                   |
| Higher outlier, $HO = Q3 + 1.5 \cdot IQR$ | 1.2024                                  | 1.6651                         | 852.6            | 0.7333                   |
| Lower outlier, $LO = Q1 - 1.5 \cdot IQR$  | 1.1989                                  | 1.6483                         | 844.0            | 0.7189                   |
| Average value, $\bar{X}$                  | 1.2019                                  | 1.6558                         | 847.8            | 0.7259                   |
| Standard deviation, $s$                   | 0.0017                                  | 0.0030                         | 1.5              | 0.0024                   |
| Coefficient of variation, $CV$ [%]        | 0.14                                    | 0.18                           | 0.18             | 0.33                     |
| Upper critical value, $UCV$               | 1.2037                                  | 1.6590                         | 849.5            | 0.7285                   |
| Lower critical value, $LCV$               | 1.2001                                  | 1.6527                         | 846.2            | 0.7234                   |

**Table S7.** The obtained values of the thermal parameters of the geopolymer samples with fireclay (1:1), and the calculated statistical parameters after 3 days of conditioning in 60°C

| Statistical parameters                    | Thermal properties of sample RSF1 |                                |                  |                          |
|-------------------------------------------|-----------------------------------|--------------------------------|------------------|--------------------------|
|                                           | $\lambda$ [W/(m·K)]               | $C_v$ [MJ/(m <sup>3</sup> ·K)] | $C_p$ [J/(kg·K)] | $a$ [mm <sup>2</sup> /s] |
| Quartile, $Q1$                            | 0.6384                            | 1.6352                         | 860.5            | 0.3901                   |
| Median, $M$                               | 0.6386                            | 1.6357                         | 860.7            | 0.3904                   |
| Quartile, $Q3$                            | 0.6386                            | 1.6370                         | 860.9            | 0.3956                   |
| Interquartile range, $IQR = (Q3 - Q1)$    | 0.0002                            | 0.0018                         | 0.4              | 0.0055                   |
| Higher outlier, $HO = Q3 + 1.5 \cdot IQR$ | 0.6388                            | 1.6388                         | 861.3            | 0.4011                   |
| Lower outlier, $LO = Q1 - 1.5 \cdot IQR$  | 0.6382                            | 1.6334                         | 860.2            | 0.3846                   |
| Average value, $\bar{X}$                  | 0.6413                            | 1.6359                         | 861.0            | 0.3920                   |
| Standard deviation, $s$                   | 0.0037                            | 0.0009                         | 0.4              | 0.0028                   |
| Coefficient of variation, $CV$ [%]        | 0.57                              | 0.06                           | 0.05             | 0.72                     |
| Upper critical value, $UCV$               | 0.6451                            | 1.6369                         | 861.4            | 0.3950                   |
| Lower critical value, $LCV$               | 0.6374                            | 1.6350                         | 860.6            | 0.3891                   |

  

| Statistical parameters                    | Thermal properties of sample GF1Fe0.5 |                                |                  |                          |
|-------------------------------------------|---------------------------------------|--------------------------------|------------------|--------------------------|
|                                           | $\lambda$ [W/(m·K)]                   | $C_v$ [MJ/(m <sup>3</sup> ·K)] | $C_p$ [J/(kg·K)] | $a$ [mm <sup>2</sup> /s] |
| Quartile, $Q1$                            | 0.6578                                | 1.7212                         | 935.2            | 0.3817                   |
| Median, $M$                               | 0.6596                                | 1.7217                         | 935.5            | 0.3829                   |
| Quartile, $Q3$                            | 0.6606                                | 1.7232                         | 935.7            | 0.3838                   |
| Interquartile range, $IQR = (Q3 - Q1)$    | 0.0028                                | 0.0020                         | 0.5              | 0.0021                   |
| Higher outlier, $HO = Q3 + 1.5 \cdot IQR$ | 0.6634                                | 1.7252                         | 936.2            | 0.3859                   |
| Lower outlier, $LO = Q1 - 1.5 \cdot IQR$  | 0.6550                                | 1.7192                         | 934.7            | 0.3796                   |
| Average value, $\bar{X}$                  | 0.6606                                | 1.7221                         | 935.9            | 0.3836                   |
| Standard deviation, $s$                   | 0.0012                                | 0.0013                         | 0.5              | 0.0016                   |
| Coefficient of variation, $CV$ [%]        | 0.18                                  | 0.08                           | 0.05             | 0.42                     |
| Upper critical value, $UCV$               | 0.6619                                | 1.7235                         | 936.5            | 0.3853                   |
| Lower critical value, $LCV$               | 0.6593                                | 1.7207                         | 935.4            | 0.3819                   |

  

| Statistical parameters                    | Thermal properties of sample GF1Fe1.0 |                                |                  |                          |
|-------------------------------------------|---------------------------------------|--------------------------------|------------------|--------------------------|
|                                           | $\lambda$ [W/(m·K)]                   | $C_v$ [MJ/(m <sup>3</sup> ·K)] | $C_p$ [J/(kg·K)] | $a$ [mm <sup>2</sup> /s] |
| Quartile, $Q1$                            | 0.6883                                | 1.6288                         | 863.2            | 0.4224                   |
| Median, $M$                               | 0.6886                                | 1.6295                         | 863.8            | 0.4231                   |
| Quartile, $Q3$                            | 0.6895                                | 1.6300                         | 864.0            | 0.4238                   |
| Interquartile range, $IQR = (Q3 - Q1)$    | 0.0012                                | 0.0012                         | 0.8              | 0.0014                   |
| Higher outlier, $HO = Q3 + 1.5 \cdot IQR$ | 0.6907                                | 1.6312                         | 864.8            | 0.4252                   |
| Lower outlier, $LO = Q1 - 1.5 \cdot IQR$  | 0.6871                                | 1.6276                         | 862.4            | 0.4210                   |
| Average value, $\bar{X}$                  | 0.6894                                | 1.6294                         | 863.9            | 0.4231                   |
| Standard deviation, $s$                   | 0.0009                                | 0.0009                         | 0.4              | 0.0008                   |
| Coefficient of variation, $CV$ [%]        | 0.13                                  | 0.05                           | 0.05             | 0.18                     |
| Upper critical value, $UCV$               | 0.6904                                | 1.6303                         | 864.4            | 0.4239                   |
| Lower critical value, $LCV$               | 0.6884                                | 1.6285                         | 863.5            | 0.4223                   |

  

| Statistical parameters                    | Thermal properties of sample GF1Fe1.5 |                                |                  |                          |
|-------------------------------------------|---------------------------------------|--------------------------------|------------------|--------------------------|
|                                           | $\lambda$ [W/(m·K)]                   | $C_v$ [MJ/(m <sup>3</sup> ·K)] | $C_p$ [J/(kg·K)] | $a$ [mm <sup>2</sup> /s] |
| Quartile, $Q1$                            | 0.7005                                | 1.6288                         | 862.3            | 0.4308                   |
| Median, $M$                               | 0.7047                                | 1.6295                         | 862.6            | 0.4331                   |
| Quartile, $Q3$                            | 0.7082                                | 1.6300                         | 862.9            | 0.4354                   |
| Interquartile range, $IQR = (Q3 - Q1)$    | 0.0077                                | 0.0012                         | 0.6              | 0.0046                   |
| Higher outlier, $HO = Q3 + 1.5 \cdot IQR$ | 0.7159                                | 1.6312                         | 863.5            | 0.4400                   |
| Lower outlier, $LO = Q1 - 1.5 \cdot IQR$  | 0.6928                                | 1.6276                         | 861.6            | 0.4262                   |

|                                    |        |        |       |        |
|------------------------------------|--------|--------|-------|--------|
| Average value, $\bar{X}$           | 0.7060 | 1.6294 | 862.6 | 0.4331 |
| Standard deviation, $s$            | 0.0038 | 0.0009 | 0.5   | 0.0024 |
| Coefficient of variation, $CV$ [%] | 0.54   | 0.05   | 0.05  | 0.55   |
| Upper critical value, $UCV$        | 0.7100 | 1.6303 | 863.0 | 0.4356 |
| Lower critical value, $LCV$        | 0.7021 | 1.6285 | 862.1 | 0.4306 |

| Statistical parameters                    | Thermal properties of sample GF1Fe2.0 |                                |                  |                          |
|-------------------------------------------|---------------------------------------|--------------------------------|------------------|--------------------------|
|                                           | $\lambda$ [W/(m·K)]                   | $C_v$ [MJ/(m <sup>3</sup> ·K)] | $C_p$ [J/(kg·K)] | $a$ [mm <sup>2</sup> /s] |
| Quartile, $Q1$                            | 0.6775                                | 1.7121                         | 892.6            | 0.3942                   |
| Median, $M$                               | 0.6783                                | 1.7156                         | 894.5            | 0.3951                   |
| Quartile, $Q3$                            | 0.6783                                | 1.7195                         | 896.5            | 0.3978                   |
| Interquartile range, $IQR = (Q3 - Q1)$    | 0.0008                                | 0.0074                         | 3.9              | 0.0036                   |
| Higher outlier, $HO = Q3 + 1.5 \cdot IQR$ | 0.6791                                | 1.7269                         | 900.4            | 0.4014                   |
| Lower outlier, $LO = Q1 - 1.5 \cdot IQR$  | 0.6767                                | 1.7047                         | 888.8            | 0.3906                   |
| Average value, $\bar{X}$                  | 0.6786                                | 1.7157                         | 894.5            | 0.3955                   |
| Standard deviation, $s$                   | 0.0005                                | 0.0039                         | 2.0              | 0.0024                   |
| Coefficient of variation, $CV$ [%]        | 0.07                                  | 0.23                           | 0.23             | 0.60                     |
| Upper critical value, $UCV$               | 0.6791                                | 1.7198                         | 896.7            | 0.3980                   |
| Lower critical value, $LCV$               | 0.6781                                | 1.7116                         | 892.4            | 0.3930                   |

| Statistical parameters                    | Thermal properties of sample GF1Fe2.5 |                                |                  |                          |
|-------------------------------------------|---------------------------------------|--------------------------------|------------------|--------------------------|
|                                           | $\lambda$ [W/(m·K)]                   | $C_v$ [MJ/(m <sup>3</sup> ·K)] | $C_p$ [J/(kg·K)] | $a$ [mm <sup>2</sup> /s] |
| Quartile, $Q1$                            | 0.6623                                | 1.7319                         | 915.4            | 0.3830                   |
| Median, $M$                               | 0.6641                                | 1.7334                         | 916.1            | 0.3836                   |
| Quartile, $Q3$                            | 0.6644                                | 1.7343                         | 916.6            | 0.3836                   |
| Interquartile range, $IQR = (Q3 - Q1)$    | 0.0021                                | 0.0024                         | 1.3              | 0.0006                   |
| Higher outlier, $HO = Q3 + 1.5 \cdot IQR$ | 0.6665                                | 1.7367                         | 917.9            | 0.3842                   |
| Lower outlier, $LO = Q1 - 1.5 \cdot IQR$  | 0.6602                                | 1.7295                         | 914.1            | 0.3824                   |
| Average value, $\bar{X}$                  | 0.6644                                | 1.7330                         | 916.0            | 0.3834                   |
| Standard deviation, $s$                   | 0.0011                                | 0.0014                         | 0.7              | 0.0007                   |
| Coefficient of variation, $CV$ [%]        | 0.16                                  | 0.08                           | 0.08             | 0.18                     |
| Upper critical value, $UCV$               | 0.6655                                | 1.7345                         | 916.8            | 0.3841                   |
| Lower critical value, $LCV$               | 0.6633                                | 1.7316                         | 915.2            | 0.3826                   |

**Table S8.** The obtained values of the thermal parameters of the geopolymer samples with fireclay (1:1.2), and the calculated statistical parameters after 3 days of conditioning in 60°C

| Statistical parameters                    | Thermal properties of sample RSF1.2 |                                |                  |                          |
|-------------------------------------------|-------------------------------------|--------------------------------|------------------|--------------------------|
|                                           | $\lambda$ [W/(m·K)]                 | $C_v$ [MJ/(m <sup>3</sup> ·K)] | $C_p$ [J/(kg·K)] | $a$ [mm <sup>2</sup> /s] |
| Quartile, $Q1$                            | 0.6421                              | 1.6462                         | 875.5            | 0.3886                   |
| Median, $M$                               | 0.6444                              | 1.6528                         | 877.4            | 0.3913                   |
| Quartile, $Q3$                            | 0.6467                              | 1.6534                         | 879.2            | 0.3935                   |
| Interquartile range, $IQR = (Q3 - Q1)$    | 0.0046                              | 0.0072                         | 3.7              | 0.0049                   |
| Higher outlier, $HO = Q3 + 1.5 \cdot IQR$ | 0.6513                              | 1.6606                         | 882.9            | 0.3984                   |
| Lower outlier, $LO = Q1 - 1.5 \cdot IQR$  | 0.6375                              | 1.6390                         | 871.9            | 0.3837                   |
| Average value, $\bar{X}$                  | 0.6456                              | 1.6508                         | 878.1            | 0.3911                   |
| Standard deviation, $s$                   | 0.0027                              | 0.0036                         | 2.02             | 0.0023                   |
| Coefficient of variation, $CV$ [%]        | 0.42                                | 0.22                           | 0.23             | 0.58                     |
| Upper critical value, $UCV$               | 0.6485                              | 1.6546                         | 880.2            | 0.3935                   |
| Lower critical value, $LCV$               | 0.6427                              | 1.6470                         | 876.0            | 0.3888                   |

| Statistical parameters | Thermal properties of sample GF1.2Fe0.5 |                                |                  |                          |
|------------------------|-----------------------------------------|--------------------------------|------------------|--------------------------|
|                        | $\lambda$ [W/(m·K)]                     | $C_v$ [MJ/(m <sup>3</sup> ·K)] | $C_p$ [J/(kg·K)] | $a$ [mm <sup>2</sup> /s] |

|                                           |        |        |       |        |
|-------------------------------------------|--------|--------|-------|--------|
| Quartile, $Q1$                            | 0.6432 | 1.6408 | 843.7 | 0.3919 |
| Median, $M$                               | 0.6435 | 1.6415 | 845.0 | 0.3922 |
| Quartile, $Q3$                            | 0.6440 | 1.6438 | 845.5 | 0.3931 |
| Interquartile range, $IQR = (Q3 - Q1)$    | 0.0008 | 0.0030 | 1.8   | 0.0012 |
| Higher outlier, $HO = Q3 + 1.5 \cdot IQR$ | 0.6448 | 1.6468 | 847.3 | 0.3943 |
| Lower outlier, $LO = Q1 - 1.5 \cdot IQR$  | 0.6424 | 1.6378 | 841.9 | 0.3907 |
| Average value, $\bar{X}$                  | 0.6442 | 1.6417 | 845.3 | 0.3924 |
| Standard deviation, $s$                   | 0.0006 | 0.0021 | 1.0   | 0.0008 |
| Coefficient of variation, $CV [\%]$       | 0.09   | 0.13   | 0.12  | 0.19   |
| Upper critical value, $UCV$               | 0.6448 | 1.6439 | 846.4 | 0.3932 |
| Lower critical value, $LCV$               | 0.6435 | 1.6395 | 844.3 | 0.3916 |

| Statistical parameters                    | Thermal properties of sample GF1.2Fe1.0 |                                |                  |                          |
|-------------------------------------------|-----------------------------------------|--------------------------------|------------------|--------------------------|
|                                           | $\lambda$ [W/(m·K)]                     | $C_v$ [MJ/(m <sup>3</sup> ·K)] | $C_p$ [J/(kg·K)] | $a$ [mm <sup>2</sup> /s] |
| Quartile, $Q1$                            | 0.6662                                  | 1.6868                         | 898.4            | 0.3947                   |
| Median, $M$                               | 0.6671                                  | 1.6881                         | 899.2            | 0.3953                   |
| Quartile, $Q3$                            | 0.6685                                  | 1.6896                         | 900.3            | 0.3988                   |
| Interquartile range, $IQR = (Q3 - Q1)$    | 0.0023                                  | 0.0028                         | 1.9              | 0.0041                   |
| Higher outlier, $HO = Q3 + 1.5 \cdot IQR$ | 0.6708                                  | 1.6924                         | 902.2            | 0.4029                   |
| Lower outlier, $LO = Q1 - 1.5 \cdot IQR$  | 0.6639                                  | 1.6840                         | 896.5            | 0.3906                   |
| Average value, $\bar{X}$                  | 0.6701                                  | 1.6880                         | 899.8            | 0.3969                   |
| Standard deviation, $s$                   | 0.0026                                  | 0.0018                         | 0.9              | 0.0032                   |
| Coefficient of variation, $CV [\%]$       | 0.39                                    | 0.11                           | 0.10             | 0.81                     |
| Upper critical value, $UCV$               | 0.6728                                  | 1.6899                         | 900.7            | 0.4003                   |
| Lower critical value, $LCV$               | 0.6673                                  | 1.6861                         | 898.8            | 0.3935                   |

| Statistical parameters                    | Thermal properties of sample GF1.2Fe1.5 |                                |                  |                          |
|-------------------------------------------|-----------------------------------------|--------------------------------|------------------|--------------------------|
|                                           | $\lambda$ [W/(m·K)]                     | $C_v$ [MJ/(m <sup>3</sup> ·K)] | $C_p$ [J/(kg·K)] | $a$ [mm <sup>2</sup> /s] |
| Quartile, $Q1$                            | 0.6770                                  | 1.6690                         | 854.1            | 0.4056                   |
| Median, $M$                               | 0.6775                                  | 1.6703                         | 854.5            | 0.4059                   |
| Quartile, $Q3$                            | 0.6786                                  | 1.6709                         | 854.8            | 0.4064                   |
| Interquartile range, $IQR = (Q3 - Q1)$    | 0.0016                                  | 0.0019                         | 0.7              | 0.0008                   |
| Higher outlier, $HO = Q3 + 1.5 \cdot IQR$ | 0.6802                                  | 1.6728                         | 855.5            | 0.4072                   |
| Lower outlier, $LO = Q1 - 1.5 \cdot IQR$  | 0.6754                                  | 1.6671                         | 853.4            | 0.4048                   |
| Average value, $\bar{X}$                  | 0.6784                                  | 1.6702                         | 854.7            | 0.4062                   |
| Standard deviation, $s$                   | 0.0009                                  | 0.0011                         | 0.4              | 0.0009                   |
| Coefficient of variation, $CV [\%]$       | 0.13                                    | 0.06                           | 0.05             | 0.23                     |
| Upper critical value, $UCV$               | 0.6793                                  | 1.6713                         | 855.2            | 0.4072                   |
| Lower critical value, $LCV$               | 0.6775                                  | 1.6690                         | 854.3            | 0.4052                   |

| Statistical parameters                    | Thermal properties of sample GF1.2Fe2.0 |                                |                  |                          |
|-------------------------------------------|-----------------------------------------|--------------------------------|------------------|--------------------------|
|                                           | $\lambda$ [W/(m·K)]                     | $C_v$ [MJ/(m <sup>3</sup> ·K)] | $C_p$ [J/(kg·K)] | $a$ [mm <sup>2</sup> /s] |
| Quartile, $Q1$                            | 0.6899                                  | 1.6955                         | 914.5            | 0.4101                   |
| Median, $M$                               | 0.6955                                  | 1.6982                         | 916.0            | 0.4110                   |
| Quartile, $Q3$                            | 0.6975                                  | 1.7001                         | 917.0            | 0.4111                   |
| Interquartile range, $IQR = (Q3 - Q1)$    | 0.0076                                  | 0.0046                         | 2.5              | 0.0010                   |
| Higher outlier, $HO = Q3 + 1.5 \cdot IQR$ | 0.7051                                  | 1.7047                         | 919.5            | 0.4121                   |
| Lower outlier, $LO = Q1 - 1.5 \cdot IQR$  | 0.6823                                  | 1.6909                         | 912.0            | 0.4091                   |
| Average value, $\bar{X}$                  | 0.6958                                  | 1.6952                         | 914.3            | 0.4094                   |
| Standard deviation, $s$                   | 0.0032                                  | 0.0081                         | 4.4              | 0.0043                   |
| Coefficient of variation, $CV [\%]$       | 0.46                                    | 0.48                           | 0.48             | 1.05                     |
| Upper critical value, $UCV$               | 0.6992                                  | 1.7037                         | 918.9            | 0.4139                   |
| Lower critical value, $LCV$               | 0.6924                                  | 1.6867                         | 909.7            | 0.4048                   |

| Statistical parameters                    | Thermal properties of sample GF1.2Fe2.5 |                                |                  |                          |
|-------------------------------------------|-----------------------------------------|--------------------------------|------------------|--------------------------|
|                                           | $\lambda$ [W/(m·K)]                     | $C_v$ [MJ/(m <sup>3</sup> ·K)] | $C_p$ [J/(kg·K)] | $a$ [mm <sup>2</sup> /s] |
| Quartile, $Q1$                            | 0.6673                                  | 1.6550                         | 850.9            | 0.4040                   |
| Median, $M$                               | 0.6685                                  | 1.6570                         | 853.4            | 0.4044                   |
| Quartile, $Q3$                            | 0.6715                                  | 1.6646                         | 854.5            | 0.4054                   |
| Interquartile range, $IQR = (Q3 - Q1)$    | 0.0042                                  | 0.0096                         | 3.6              | 0.0014                   |
| Higher outlier, $HO = Q3 + 1.5 \cdot IQR$ | 0.6757                                  | 1.6742                         | 858.1            | 0.4068                   |
| Lower outlier, $LO = Q1 - 1.5 \cdot IQR$  | 0.6631                                  | 1.6454                         | 847.3            | 0.4026                   |
| Average value, $\bar{X}$                  | 0.6716                                  | 1.6582                         | 854.7            | 0.4050                   |
| Standard deviation, $s$                   | 0.0023                                  | 0.0056                         | 2.6              | 0.0032                   |
| Coefficient of variation, $CV$ [%]        | 0.34                                    | 0.34                           | 0.31             | 0.79                     |
| Upper critical value, $UCV$               | 0.6740                                  | 1.6640                         | 857.5            | 0.4083                   |
| Lower critical value, $LCV$               | 0.6691                                  | 1.6523                         | 852.0            | 0.4017                   |
